# Supplementary material for: Defining quantification methods and optimizing protocols for microarray hybridization of circulating microRNAs
Source: PubMed Central journal article supplement (PMC5552704; doi:10.1038/s41598-017-08134-3), 2017-08-10
Supplement: 41598_2017_8134_MOESM1_ESM.pdf [file 41598_2017_8134_MOESM1_ESM.pdf]

## **SUPPLEMENTARY INFORMATION**

### **Defining quantification methods and optimizing protocols for microarray hybridization of circulating microRNAs.**

Anna Garcia-Elias, Leonor Alloza, Eulàlia Puigdecamet, Lara Nonell, Marta Tajés, Joao Curado, Cristina Enjuanes, Oscar Díaz, Jordi Bruguera, Julio Martí-Almor, Josep Comín-Colet, Begoña Benito.

**Table S1.** RNA contents in five different concentrations of miRNA-Ref samples.

**Table S2.** 260/230 and 260/280 ratios provided by the Nanodrop on miRNA-Ref and plasma samples at different concentrations.

**Table S3.** RNA contents in five different concentrations of plasma samples.

**Table S4.** Percentage of miRNA in miRNA-Ref samples according to the Bio-SmallChip electropherograms.

**Table S5.** List of miRNAs detected in the miRNA-Ref arrays.

**Table S6.** List of miRNAs detected in the human plasma arrays.

**Table S1: RNA contents in five different concentrations of miRNA-Ref**

|                  | Quantification platforms (ng/μL) |                |                     |                |                     |                |                     |                |
|------------------|----------------------------------|----------------|---------------------|----------------|---------------------|----------------|---------------------|----------------|
|                  | Nanoquant                        | normalized (*) | Nanodrop            | normalized (*) | Qubit               | normalized (*) | Bio-PicoChip        | normalized (*) |
|                  | 9.52                             | 1.00           | 9.40                | 1.00           | 2.71                | 1.00           | 8.37                | 1.00           |
|                  | 9.12                             | 0.96           | 9.60                | 1.02           | 2.69                | 0.99           | 8.32                | 1.02           |
|                  | 9.60                             | 1.01           | 8.60                | 0.91           | 2.61                | 0.96           | 8.03                | 0.97           |
| <i>Mean (SD)</i> | <b>9.41 (0.26)</b>               |                | <b>9.20 (0.53)</b>  |                | <b>2.67 (0.05)</b>  |                | <b>8.24 (0.18)</b>  |                |
| <i>CV (%)</i>    | <b>2.73</b>                      |                | <b>5.75</b>         |                | <b>1.98</b>         |                | <b>2.20</b>         |                |
|                  | 22.40                            | 2.35           | 22.60               | 2.40           | 6.64                | 2.45           | 20.12               | 2.44           |
|                  | 22.56                            | 2.37           | 22.40               | 2.38           | 6.79                | 2.51           | 18.66               | 2.26           |
|                  | 22.88                            | 2.40           | 22.30               | 2.37           | 6.43                | 2.37           | 20.09               | 2.44           |
| <i>Mean (SD)</i> | <b>22.61 (0.24)</b>              |                | <b>22.43 (0.15)</b> |                | <b>6.62 (0.18)</b>  |                | <b>19.62 (0.84)</b> |                |
| <i>CV (%)</i>    | <b>1.08</b>                      |                | <b>0.68</b>         |                | <b>2.73</b>         |                | <b>4.26</b>         |                |
|                  | 29.92                            | 3.14           | 30.20               | 3.21           | 8.93                | 3.30           | 33.72               | 4.09           |
|                  | 30.96                            | 3.25           | 29.90               | 3.18           | 8.64                | 3.19           | 32.63               | 3.96           |
|                  | 29.52                            | 3.10           | 29.70               | 3.16           | 8.28                | 3.06           | 33.69               | 4.09           |
| <i>Mean (SD)</i> | <b>30.13 (0.74)</b>              |                | <b>29.93 (0.21)</b> |                | <b>8.62 (0.33)</b>  |                | <b>33.35 (0.62)</b> |                |
| <i>CV (%)</i>    | <b>2.47</b>                      |                | <b>0.69</b>         |                | <b>3.78</b>         |                | <b>1.86</b>         |                |
|                  | 39.76                            | 4.18           | 40.20               | 4.28           | 12.59               | 4.65           | 43.19               | 5.24           |
|                  | 39.60                            | 4.16           | 40.30               | 4.29           | 12.24               | 4.52           | 41.80               | 5.07           |
|                  | 39.04                            | 4.10           | 40.00               | 4.26           | 12.59               | 4.65           | 43.00               | 5.22           |
| <i>Mean (SD)</i> | <b>39.47 (0.38)</b>              |                | <b>40.17 (0.15)</b> |                | <b>12.47 (0.20)</b> |                | <b>42.66 (0.76)</b> |                |
| <i>CV (%)</i>    | <b>1.00</b>                      |                | <b>0.40</b>         |                | <b>1.60</b>         |                | <b>1.77</b>         |                |
|                  | 46.00                            | 4.83           | 46.60               | 4.96           | 15.61               | 5.76           | 46.97               | 5.70           |
|                  | 46.00                            | 4.83           | 46.60               | 4.96           | 15.05               | 5.55           | 48.60               | 5.90           |
|                  | 45.28                            | 4.76           | 46.90               | 4.99           | 15.52               | 5.73           | 46.80               | 5.68           |
| <i>Mean (SD)</i> | <b>45.76 (0.42)</b>              |                | <b>46.70 (0.17)</b> |                | <b>15.39 (0.30)</b> |                | <b>47.46 (0.99)</b> |                |
| <i>CV (%)</i>    | <b>0.91</b>                      |                | <b>0.37</b>         |                | <b>1.95</b>         |                | <b>2.10</b>         |                |

**Table S2: 260/230 and 260/280 ratios of miRNA-Ref and plasma samples**

| miRNA-Ref              |                           |                           | plasma samples         |                           |                           |
|------------------------|---------------------------|---------------------------|------------------------|---------------------------|---------------------------|
| Nanodrop (ng/ $\mu$ L) | <i>260/230 ratio</i>      | <i>260/280 ratio</i>      | Nanodrop (ng/ $\mu$ L) | <i>260/230 ratio</i>      | <i>260/280 ratio</i>      |
| 9.40                   | 2.03                      | 1.93                      | 18.40                  | 0.17                      | 1.28                      |
| 9.60                   | 2.29                      | 1.78                      | 16.20                  | 0.16                      | 1.27                      |
| 8.60                   | 2.25                      | 2.31                      | 19.80                  | 0.19                      | 1.26                      |
| 22.60                  | 1.94                      | 2.03                      | 27.80                  | 0.14                      | 1.21                      |
| 22.40                  | 2.03                      | 1.96                      | 26.60                  | 0.14                      | 1.20                      |
| 22.30                  | 1.91                      | 1.86                      | 27.60                  | 0.14                      | 1.21                      |
| 30.20                  | 1.93                      | 1.95                      | 39.80                  | 0.13                      | 1.22                      |
| 29.90                  | 1.94                      | 2.01                      | 36.50                  | 0.12                      | 1.22                      |
| 29.70                  | 1.95                      | 2.02                      | 41.20                  | 0.13                      | 1.22                      |
| 40.20                  | 1.99                      | 1.97                      | 54.50                  | 0.15                      | 1.21                      |
| 40.30                  | 1.91                      | 1.99                      | 50.30                  | 0.14                      | 1.21                      |
| 40.00                  | 1.89                      | 1.97                      | 46.40                  | 0.13                      | 1.21                      |
| 46.60                  | 1.95                      | 1.99                      | 61.10                  | 0.14                      | 1.19                      |
| 46.60                  | 1.94                      | 1.98                      | 57.40                  | 0.13                      | 1.19                      |
| 46.90                  | 1.94                      | 1.99                      | 62.60                  | 0.14                      | 1.17                      |
| <i>Mean (SD)</i>       | <b><i>1.99 (0.12)</i></b> | <b><i>1.98 (0.11)</i></b> |                        | <b><i>0.14 (0.02)</i></b> | <b><i>1.22 (0.03)</i></b> |

**Table S3: RNA contents in five different concentrations of plasma samples**

|                  |                     | Quantification platforms (ng/μL) |                     |                       |                    |                       |                      |                       |  |
|------------------|---------------------|----------------------------------|---------------------|-----------------------|--------------------|-----------------------|----------------------|-----------------------|--|
|                  | <b>Nanoquant</b>    | <i>normalized (*)</i>            | <b>Nanodrop</b>     | <i>normalized (*)</i> | <b>Qubit</b>       | <i>normalized (*)</i> | <b>Bio-PicoChip</b>  | <i>normalized (*)</i> |  |
|                  | 13.92               | 1.05                             | 18.40               | 1.00                  | 3.44               | 1.48                  | 0.330                | 1.00                  |  |
|                  | 13.28               | 1.00                             | 16.20               | 0.88                  | 1.77               | 0.76                  | 0.228                | 0.69                  |  |
|                  | 13.92               | 1.05                             | 19.80               | 1.08                  | 2.33               | 1.00                  | 0.249                | 0.75                  |  |
| <i>Mean (SD)</i> | <b>13.71 (0.37)</b> |                                  | <b>18.13 (1.81)</b> |                       | <b>2.51 (0.85)</b> |                       | <b>0.269 (0.054)</b> |                       |  |
| <i>CV (%)</i>    | <b>2.70</b>         |                                  | <b>10.01</b>        |                       | <b>33.82</b>       |                       | <b>20.02</b>         |                       |  |
|                  | 19.52               | 1.47                             | 27.80               | 1.51                  | 4.16               | 1.79                  | 0.330                | 1.00                  |  |
|                  | 19.04               | 1.43                             | 26.60               | 1.45                  | 4.07               | 1.75                  | ---                  | ---                   |  |
|                  | 18.88               | 1.42                             | 27.60               | 1.50                  | 3.95               | 1.70                  | 0.275                | 0.83                  |  |
| <i>Mean (SD)</i> | <b>19.15 (0.33)</b> |                                  | <b>27.33 (0.64)</b> |                       | <b>4.06 (0.10)</b> |                       | <b>0.303 (0.039)</b> |                       |  |
| <i>CV (%)</i>    | <b>1.74</b>         |                                  | <b>2.35</b>         |                       | <b>2.59</b>        |                       | <b>12.86</b>         |                       |  |
|                  | 28.64               | 2.16                             | 39.80               | 2.16                  | 5.88               | 2.52                  | 0.312                | 0.95                  |  |
|                  | 28.40               | 2.14                             | 36.50               | 1.98                  | 5.77               | 2.48                  | 0.351                | 1.06                  |  |
|                  | 27.60               | 2.08                             | 41.20               | 2.24                  | 5.68               | 2.44                  | 0.366                | 1.11                  |  |
| <i>Mean (SD)</i> | <b>28.21 (0.54)</b> |                                  | <b>39.17 (2.41)</b> |                       | <b>5.78 (0.10)</b> |                       | <b>0.343 (0.028)</b> |                       |  |
| <i>CV (%)</i>    | <b>1.93</b>         |                                  | <b>6.16</b>         |                       | <b>1.73</b>        |                       | <b>8.13</b>          |                       |  |
|                  | 35.28               | 2.66                             | 54.50               | 2.96                  | 7.19               | 3.09                  | 0.320                | 0.97                  |  |
|                  | 36.88               | 2.78                             | 50.30               | 2.73                  | 7.33               | 3.15                  | 0.340                | 1.03                  |  |
|                  | 32.64               | 2.46                             | 46.40               | 2.52                  | 7.44               | 3.19                  | ---                  | ---                   |  |
| <i>Mean (SD)</i> | <b>34.93 (2.14)</b> |                                  | <b>50.40 (4.05)</b> |                       | <b>7.32 (0.13)</b> |                       | <b>0.330 (0.014)</b> |                       |  |
| <i>CV (%)</i>    | <b>6.13</b>         |                                  | <b>8.04</b>         |                       | <b>1.71</b>        |                       | <b>4.29</b>          |                       |  |
|                  | 39.60               | 2.98                             | 61.10               | 3.32                  | 9.11               | 3.91                  | 0.403                | 1.22                  |  |
|                  | 39.12               | 2.95                             | 57.40               | 3.12                  | 9.22               | 3.96                  | 0.222                | 0.67                  |  |
|                  | 34.24               | 2.58                             | 62.60               | 3.40                  | 9.08               | 3.90                  | 0.385                | 1.17                  |  |
| <i>Mean (SD)</i> | <b>37.65 (2.97)</b> |                                  | <b>60.37 (2.68)</b> |                       | <b>9.14 (0.07)</b> |                       | <b>0.337 (0.100)</b> |                       |  |
| <i>CV (%)</i>    | <b>7.88</b>         |                                  | <b>4.43</b>         |                       | <b>0.81</b>        |                       | <b>29.62</b>         |                       |  |

**Table 4: Percentage of miRNA in miRNA-Ref samples**

| <b>10 ng/<math>\mu</math>L working dilution</b> | <b>% of miRNA</b> |
|-------------------------------------------------|-------------------|
| 1                                               | 21                |
| 2                                               | 21                |
| 3                                               | 20                |
| 4                                               | 21                |
| 5                                               | 23                |
| 6                                               | 23                |
| 7                                               | 25                |
| 8                                               | 24                |
| 9                                               | 23                |
| 10                                              | 23                |
| <i>Mean (SD)</i>                                | 22 (1.58)         |

**Table S5: List of miRNAs detected in the miRNA-Ref arrays**

|                |                   |                     |
|----------------|-------------------|---------------------|
| hsa-mir-1224   | hsa-mir-523       | hsa-miR-1228        |
| hsa-mir-124-1  | hsa-mir-525       | hsa-miR-122         |
| hsa-mir-124-2  | hsa-mir-525       | hsa-miR-1231        |
| hsa-mir-124-3  | hsa-mir-548ai     | hsa-miR-1238        |
| hsa-mir-197    | hsa-mir-548ai     | hsa-miR-124-star    |
| hsa-mir-200b   | hsa-mir-550a-1    | hsa-miR-1246        |
| hsa-mir-20b    | hsa-mir-550a-2    | hsa-miR-1247        |
| hsa-mir-20b    | hsa-mir-550a-3    | hsa-miR-124         |
| hsa-mir-214    | hsa-mir-572       | hsa-miR-125a-3p     |
| hsa-mir-23a    | hsa-mir-629       | hsa-miR-125a-5p     |
| hsa-mir-302c   | hsa-mir-663       | hsa-miR-125b-1-star |
| hsa-mir-30c-2  | hsa-mir-885       | hsa-miR-125b-2-star |
| hsa-mir-3154   | hsa-mir-933       | hsa-miR-125b        |
| hsa-mir-3180-1 | hsa-mir-935       | hsa-miR-1260b       |
| hsa-mir-3180-3 | hsa-mir-941-3     | hsa-miR-1268        |
| hsa-mir-3180-4 | hsa-mir-941-4     | hsa-miR-1268b       |
| hsa-mir-339    | hsa-mir-99b       | hsa-miR-126         |
| hsa-mir-3648   | hsa-let-7a        | hsa-miR-127-3p      |
| hsa-mir-3656   | hsa-let-7b        | hsa-miR-1271        |
| hsa-mir-3676   | hsa-let-7c        | hsa-miR-1275        |
| hsa-mir-3679   | hsa-let-7d-star   | hsa-miR-1280        |
| hsa-mir-3687   | hsa-let-7d        | hsa-miR-1281        |
| hsa-mir-3960   | hsa-let-7e        | hsa-miR-1287        |
| hsa-mir-423    | hsa-let-7f        | hsa-miR-128         |
| hsa-mir-4449   | hsa-let-7g        | hsa-miR-129-3p      |
| hsa-mir-4466   | hsa-let-7i        | hsa-miR-129-5p      |
| hsa-mir-4469   | hsa-miR-100       | hsa-miR-1296        |
| hsa-mir-4485   | hsa-miR-103a      | hsa-miR-1301        |
| hsa-mir-4523   | hsa-miR-105       | hsa-miR-1307        |
| hsa-mir-4634   | hsa-miR-106a      | hsa-miR-130a        |
| hsa-mir-4758   | hsa-miR-106b-star | hsa-miR-130b        |
| hsa-mir-4758   | hsa-miR-106b      | hsa-miR-1323        |
| hsa-mir-4785   | hsa-miR-107       | hsa-miR-132         |
| hsa-mir-4787   | hsa-miR-10a       | hsa-miR-133a        |
| hsa-mir-485    | hsa-miR-10b-star  | hsa-miR-133b        |
| hsa-mir-500b   | hsa-miR-10b       | hsa-miR-134         |
| hsa-mir-502    | hsa-miR-1180      | hsa-miR-135a-star   |
| hsa-mir-5095   | hsa-miR-1202      | hsa-miR-137         |
| hsa-mir-516a-1 | hsa-miR-1207-5p   | hsa-miR-138-1-star  |
| hsa-mir-516a-2 | hsa-miR-1224-5p   | hsa-miR-138-2-star  |
| hsa-mir-516b-1 | hsa-miR-1225-5p   | hsa-miR-138         |
| hsa-mir-518e   | hsa-miR-1226      | hsa-miR-139-3p      |
| hsa-mir-520g   | hsa-miR-1228-star | hsa-miR-139-5p      |

|                     |                   |                    |
|---------------------|-------------------|--------------------|
| hsa-miR-140-3p      | hsa-miR-1909      | hsa-miR-219-2-3p   |
| hsa-miR-140-5p      | hsa-miR-191-star  | hsa-miR-21         |
| hsa-miR-141         | hsa-miR-1910      | hsa-miR-22-star    |
| hsa-miR-143-star    | hsa-miR-1915      | hsa-miR-221        |
| hsa-miR-143         | hsa-miR-191       | hsa-miR-222        |
| hsa-miR-145         | hsa-miR-192-star  | hsa-miR-223        |
| hsa-miR-1469        | hsa-miR-192       | hsa-miR-224-star   |
| hsa-miR-146a        | hsa-miR-193a-5p   | hsa-miR-224        |
| hsa-miR-146b-5p     | hsa-miR-193b-star | hsa-miR-2277-5p    |
| hsa-miR-148a        | hsa-miR-193b      | hsa-miR-22         |
| hsa-miR-148b        | hsa-miR-194-star  | hsa-miR-2392       |
| hsa-miR-149-star    | hsa-miR-194       | hsa-miR-23a-star   |
| hsa-miR-149         | hsa-miR-195       | hsa-miR-23a        |
| hsa-miR-150-star    | hsa-miR-196a      | hsa-miR-23b-star   |
| hsa-miR-150         | hsa-miR-196b      | hsa-miR-23b        |
| hsa-miR-151-3p      | hsa-miR-1972      | hsa-miR-23c        |
| hsa-miR-151-5p      | hsa-miR-1973      | hsa-miR-24-2-star  |
| hsa-miR-151b        | hsa-miR-197       | hsa-miR-24         |
| hsa-miR-152         | hsa-miR-199a-3p   | hsa-miR-25-star    |
| hsa-miR-153         | hsa-miR-199a-5p   | hsa-miR-25         |
| hsa-miR-154         | hsa-miR-199b-3p   | hsa-miR-26a        |
| hsa-miR-155         | hsa-miR-199b-5p   | hsa-miR-26b        |
| hsa-miR-1587        | hsa-miR-19a       | hsa-miR-27a-star   |
| hsa-miR-15a         | hsa-miR-19b       | hsa-miR-27a        |
| hsa-miR-15b         | hsa-miR-1         | hsa-miR-27b-star   |
| hsa-miR-16          | hsa-miR-200a-star | hsa-miR-27b        |
| hsa-miR-17-star     | hsa-miR-200a      | hsa-miR-28-3p      |
| hsa-miR-17          | hsa-miR-200b-star | hsa-miR-28-5p      |
| hsa-miR-181a-2-star | hsa-miR-200b      | hsa-miR-2861       |
| hsa-miR-181a-star   | hsa-miR-200c      | hsa-miR-296-3p     |
| hsa-miR-181a        | hsa-miR-202       | hsa-miR-299-3p     |
| hsa-miR-181b        | hsa-miR-203       | hsa-miR-299-5p     |
| hsa-miR-181c-star   | hsa-miR-204       | hsa-miR-29a        |
| hsa-miR-181c        | hsa-miR-205       | hsa-miR-29b-1-star |
| hsa-miR-181d        | hsa-miR-206       | hsa-miR-29b-2-star |
| hsa-miR-1825        | hsa-miR-20a       | hsa-miR-29b        |
| hsa-miR-182         | hsa-miR-20b-star  | hsa-miR-29c-star   |
| hsa-miR-183         | hsa-miR-20b       | hsa-miR-29c        |
| hsa-miR-184         | hsa-miR-210       | hsa-miR-302a-star  |
| hsa-miR-185         | hsa-miR-2110      | hsa-miR-302a       |
| hsa-miR-187         | hsa-miR-212       | hsa-miR-302b       |
| hsa-miR-188-5p      | hsa-miR-214-star  | hsa-miR-302c-star  |
| hsa-miR-18a-star    | hsa-miR-214       | hsa-miR-302c       |
| hsa-miR-18a         | hsa-miR-215       | hsa-miR-302d-star  |
| hsa-miR-18b         | hsa-miR-216b      | hsa-miR-302d       |
| hsa-miR-1908        | hsa-miR-217       | hsa-miR-30a-star   |

|                    |                  |                  |
|--------------------|------------------|------------------|
| hsa-miR-30a        | hsa-miR-34a      | hsa-miR-3911     |
| hsa-miR-30b-star   | hsa-miR-34b-star | hsa-miR-3937     |
| hsa-miR-30b        | hsa-miR-34c-3p   | hsa-miR-3940-5p  |
| hsa-miR-30c-2-star | hsa-miR-34c-5p   | hsa-miR-3960     |
| hsa-miR-30c        | hsa-miR-3607-5p  | hsa-miR-409-3p   |
| hsa-miR-30d        | hsa-miR-3609     | hsa-miR-409-5p   |
| hsa-miR-30e-star   | hsa-miR-361-5p   | hsa-miR-410      |
| hsa-miR-30e        | hsa-miR-3613-3p  | hsa-miR-411-star |
| hsa-miR-31-star    | hsa-miR-3615     | hsa-miR-411      |
| hsa-miR-3124-5p    | hsa-miR-3619-5p  | hsa-miR-421      |
| hsa-miR-3135b      | hsa-miR-362-5p   | hsa-miR-422a     |
| hsa-miR-3141       | hsa-miR-3621     | hsa-miR-423-3p   |
| hsa-miR-3162-5p    | hsa-miR-363      | hsa-miR-423-5p   |
| hsa-miR-3175       | hsa-miR-3648     | hsa-miR-424-star |
| hsa-miR-3178       | hsa-miR-3651     | hsa-miR-424      |
| hsa-miR-3180-3p    | hsa-miR-3652     | hsa-miR-425-star |
| hsa-miR-3180       | hsa-miR-3656     | hsa-miR-4253     |
| hsa-miR-3185       | hsa-miR-3663-3p  | hsa-miR-425      |
| hsa-miR-3188       | hsa-miR-3665     | hsa-miR-4269     |
| hsa-miR-3195       | hsa-miR-3679-5p  | hsa-miR-4270     |
| hsa-miR-3196       | hsa-miR-3687     | hsa-miR-4281     |
| hsa-miR-3197       | hsa-miR-370      | hsa-miR-4284     |
| hsa-miR-31         | hsa-miR-371-3p   | hsa-miR-4286     |
| hsa-miR-3200-3p    | hsa-miR-371-5p   | hsa-miR-4298     |
| hsa-miR-320a       | hsa-miR-371b-5p  | hsa-miR-4306     |
| hsa-miR-320b       | hsa-miR-372      | hsa-miR-4310     |
| hsa-miR-320c       | hsa-miR-373      | hsa-miR-4317     |
| hsa-miR-320d       | hsa-miR-374b     | hsa-miR-431      |
| hsa-miR-320e       | hsa-miR-375      | hsa-miR-4322     |
| hsa-miR-323-3p     | hsa-miR-376a     | hsa-miR-4324     |
| hsa-miR-324-3p     | hsa-miR-376c     | hsa-miR-4329     |
| hsa-miR-324-5p     | hsa-miR-377-star | hsa-miR-432      |
| hsa-miR-328        | hsa-miR-378-star | hsa-miR-433      |
| hsa-miR-329        | hsa-miR-378      | hsa-miR-4417     |
| hsa-miR-330-3p     | hsa-miR-378b     | hsa-miR-4429     |
| hsa-miR-331-3p     | hsa-miR-378c     | hsa-miR-4430     |
| hsa-miR-331-5p     | hsa-miR-378d     | hsa-miR-4433     |
| hsa-miR-335        | hsa-miR-378e     | hsa-miR-4443     |
| hsa-miR-337-5p     | hsa-miR-378f     | hsa-miR-4449     |
| hsa-miR-338-5p     | hsa-miR-378g     | hsa-miR-4454     |
| hsa-miR-339-3p     | hsa-miR-378h     | hsa-miR-4458     |
| hsa-miR-339-5p     | hsa-miR-378i     | hsa-miR-4459     |
| hsa-miR-342-3p     | hsa-miR-379      | hsa-miR-4462     |
| hsa-miR-342-5p     | hsa-miR-381      | hsa-miR-4463     |
| hsa-miR-345        | hsa-miR-382      | hsa-miR-4465     |
| hsa-miR-346        | hsa-miR-383      | hsa-miR-4466     |



|                   |                   |                   |
|-------------------|-------------------|-------------------|
| hsa-miR-4467      | hsa-miR-4721      | hsa-miR-509-3p    |
| hsa-miR-4484      | hsa-miR-4728-5p   | hsa-miR-509-5p    |
| hsa-miR-4485      | hsa-miR-4732-5p   | hsa-miR-510       |
| hsa-miR-4486      | hsa-miR-4734      | hsa-miR-512-3p    |
| hsa-miR-4487      | hsa-miR-4739      | hsa-miR-512-5p    |
| hsa-miR-4488      | hsa-miR-4741      | hsa-miR-513a-5p   |
| hsa-miR-4492      | hsa-miR-4743      | hsa-miR-513b      |
| hsa-miR-4497      | hsa-miR-4745-5p   | hsa-miR-513c      |
| hsa-miR-4498      | hsa-miR-4749-5p   | hsa-miR-514       |
| hsa-miR-449a      | hsa-miR-4750      | hsa-miR-514b-5p   |
| hsa-miR-449b-star | hsa-miR-4758-5p   | hsa-miR-515-3p    |
| hsa-miR-449b      | hsa-miR-4763-3p   | hsa-miR-515-5p    |
| hsa-miR-449c      | hsa-miR-4764-5p   | hsa-miR-516a-5p   |
| hsa-miR-4505      | hsa-miR-4787-5p   | hsa-miR-516b      |
| hsa-miR-4507      | hsa-miR-4800-3p   | hsa-miR-517-star  |
| hsa-miR-4508      | hsa-miR-483-5p    | hsa-miR-517a      |
| hsa-miR-4510      | hsa-miR-484       | hsa-miR-517b      |
| hsa-miR-4516      | hsa-miR-485-3p    | hsa-miR-517c      |
| hsa-miR-451       | hsa-miR-485-5p    | hsa-miR-518a-3p   |
| hsa-miR-4521      | hsa-miR-486-3p    | hsa-miR-518a-5p   |
| hsa-miR-452       | hsa-miR-486-5p    | hsa-miR-518b      |
| hsa-miR-4530      | hsa-miR-487a      | hsa-miR-518c-star |
| hsa-miR-4532      | hsa-miR-487b      | hsa-miR-518d-5p   |
| hsa-miR-4534      | hsa-miR-489       | hsa-miR-518e-star |
| hsa-miR-4539      | hsa-miR-490-5p    | hsa-miR-518e      |
| hsa-miR-454       | hsa-miR-491-5p    | hsa-miR-518f-star |
| hsa-miR-455-3p    | hsa-miR-493-star  | hsa-miR-518f      |
| hsa-miR-4634      | hsa-miR-493       | hsa-miR-519a-star |
| hsa-miR-4640-5p   | hsa-miR-494       | hsa-miR-519a      |
| hsa-miR-4649-5p   | hsa-miR-495       | hsa-miR-519b-3p   |
| hsa-miR-4651      | hsa-miR-497       | hsa-miR-519b-5p   |
| hsa-miR-4655-5p   | hsa-miR-498       | hsa-miR-519c-3p   |
| hsa-miR-4656      | hsa-miR-499-5p    | hsa-miR-519c-5p   |
| hsa-miR-4665-5p   | hsa-miR-500a-star | hsa-miR-519d      |
| hsa-miR-4668-5p   | hsa-miR-500a      | hsa-miR-519e-star |
| hsa-miR-4669      | hsa-miR-501-3p    | hsa-miR-520a-3p   |
| hsa-miR-4674      | hsa-miR-501-5p    | hsa-miR-520a-5p   |
| hsa-miR-4685-5p   | hsa-miR-502-3p    | hsa-miR-520c-5p   |
| hsa-miR-4687-3p   | hsa-miR-503       | hsa-miR-520d-3p   |
| hsa-miR-4688      | hsa-miR-504       | hsa-miR-520d-5p   |
| hsa-miR-4689      | hsa-miR-505-star  | hsa-miR-520g      |
| hsa-miR-4690-5p   | hsa-miR-505       | hsa-miR-520h      |
| hsa-miR-4695-5p   | hsa-miR-506       | hsa-miR-522-star  |
| hsa-miR-4706      | hsa-miR-508-3p    | hsa-miR-522       |
| hsa-miR-4707-5p   | hsa-miR-508-5p    | hsa-miR-523-star  |
| hsa-miR-4710      | hsa-miR-509-3-5p  | hsa-miR-523       |

|                   |                  |                    |
|-------------------|------------------|--------------------|
| hsa-miR-524-3p    | hsa-miR-629-star | hsa-miR-874        |
| hsa-miR-524-5p    | hsa-miR-629      | hsa-miR-875-3p     |
| hsa-miR-525-3p    | hsa-miR-638      | hsa-miR-877        |
| hsa-miR-525-5p    | hsa-miR-642b     | hsa-miR-885-3p     |
| hsa-miR-526a      | hsa-miR-652      | hsa-miR-885-5p     |
| hsa-miR-526b      | hsa-miR-654-3p   | hsa-miR-891a       |
| hsa-miR-527       | hsa-miR-654-5p   | hsa-miR-9-star     |
| hsa-miR-532-3p    | hsa-miR-660      | hsa-miR-92a-1-star |
| hsa-miR-532-5p    | hsa-miR-663      | hsa-miR-92a        |
| hsa-miR-542-5p    | hsa-miR-664-star | hsa-miR-92b-star   |
| hsa-miR-543       | hsa-miR-665      | hsa-miR-92b        |
| hsa-miR-548ak     | hsa-miR-671-5p   | hsa-miR-93-star    |
| hsa-miR-550a-star | hsa-miR-675-star | hsa-miR-933        |
| hsa-miR-550a      | hsa-miR-675      | hsa-miR-934        |
| hsa-miR-551b-star | hsa-miR-7-1-star | hsa-miR-935        |
| hsa-miR-572       | hsa-miR-708      | hsa-miR-939        |
| hsa-miR-574-3p    | hsa-miR-720      | hsa-miR-93         |
| hsa-miR-574-5p    | hsa-miR-744      | hsa-miR-940        |
| hsa-miR-578       | hsa-miR-760      | hsa-miR-941        |
| hsa-miR-584       | hsa-miR-762      | hsa-miR-98         |
| hsa-miR-598       | hsa-miR-766      | hsa-miR-99a        |
| hsa-miR-602       | hsa-miR-767-5p   | hsa-miR-99b-star   |
| hsa-miR-625       | hsa-miR-769-5p   | hsa-miR-99b        |
| hsa-miR-628-3p    | hsa-miR-770-5p   | hsa-miR-9          |

**Table S6: List of miRNAs detected in the human plasma arrays**

|                  |                  |                 |
|------------------|------------------|-----------------|
| hsa-let-7b-5p    | hsa-miR-4484     | hsa-miR-663a    |
| hsa-miR-1227-5p  | hsa-miR-4487     | hsa-mir-6722    |
| hsa-miR-1228-5p  | hsa-miR-4488     | hsa-miR-6722-3p |
| hsa-miR-1237-5p  | hsa-miR-4492     | hsa-miR-6724-5p |
| hsa-miR-1268a    | hsa-miR-4497     | hsa-miR-6727-5p |
| hsa-miR-1268b    | hsa-miR-4508     | hsa-miR-6729-5p |
| hsa-miR-1273g-3p | hsa-miR-4516     | hsa-miR-6732-5p |
| hsa-miR-1281     | hsa-miR-4529-3p  | hsa-miR-6750-5p |
| hsa-miR-1343-5p  | hsa-miR-4530     | hsa-miR-6752-5p |
| hsa-miR-1469     | hsa-miR-4532     | hsa-miR-6756-5p |
| hsa-miR-149-3p   | hsa-miR-4632-5p  | hsa-miR-6765-5p |
| hsa-miR-1908-5p  | hsa-miR-4668-5p  | hsa-miR-6771-5p |
| hsa-miR-1915-3p  | hsa-miR-4687-3p  | hsa-miR-6775-5p |
| hsa-miR-2277-5p  | hsa-miR-4695-5p  | hsa-mir-6776    |
| hsa-miR-2861     | hsa-miR-4701-3p  | hsa-miR-6777-5p |
| hsa-miR-297      | hsa-miR-4706     | hsa-miR-6779-5p |
| hsa-miR-3064-5p  | hsa-miR-4707-5p  | hsa-miR-6786-5p |
| hsa-miR-3128     | hsa-miR-4739     | hsa-miR-6789-5p |
| hsa-miR-3141     | hsa-miR-4745-5p  | hsa-miR-6791-5p |
| hsa-miR-3148     | hsa-miR-4763-3p  | hsa-miR-6794-5p |
| hsa-miR-3196     | hsa-miR-4787-5p  | hsa-mir-6800    |
| hsa-miR-3201     | hsa-miR-486-5p   | hsa-miR-6800-5p |
| hsa-miR-320a     | hsa-miR-5001-5p  | hsa-miR-6803-5p |
| hsa-miR-320b     | hsa-mir-520g     | hsa-miR-6805-5p |
| hsa-miR-320c     | hsa-mir-520h     | hsa-miR-6816-5p |
| hsa-miR-320d     | hsa-mir-550a-1   | hsa-miR-6821-5p |
| hsa-miR-320e     | hsa-mir-550a-2   | hsa-miR-6850-5p |
| hsa-miR-3613-3p  | hsa-mir-550a-3   | hsa-miR-6858-5p |
| hsa-miR-3620-5p  | hsa-miR-5787     | hsa-miR-6869-5p |
| hsa-miR-3621     | hsa-miR-595      | hsa-miR-7108-5p |
| hsa-miR-3656     | hsa-miR-6068     | hsa-miR-7110-5p |
| hsa-miR-3665     | hsa-miR-6085     | hsa-mir-7515    |
| hsa-miR-378h     | hsa-miR-6087     | hsa-miR-762     |
| hsa-miR-3940-5p  | hsa-miR-6088     | hsa-miR-7704    |
| hsa-miR-3960     | hsa-miR-6089     | hsa-miR-8069    |
| hsa-miR-4281     | hsa-miR-6090     | hsa-miR-8072    |
| hsa-miR-4429     | hsa-miR-6125     | hsa-miR-8075    |
| hsa-miR-4440     | hsa-miR-6126     | hsa-miR-8084    |
| hsa-miR-4466     | hsa-miR-638      |                 |
| hsa-miR-4467     | hsa-miR-6511b-5p |                 |
